# Supplementary material for: Electrospinning of collagen: enzymatic and spectroscopic analyses reveal solvent-independent disruption of the triple-helical structure
Source: Royal Society of Chemistry journal article supplement (doi:10.1039/d2tb02602c), 2023-01-01
Supplement: d2tb02602c1.pdf [file d2tb02602c1.pdf]

Electronic Supplementary Information

for

**Electrospinning of collagen: Enzymatic and spectroscopical analyses reveal solvent-independent disruption of the triple-helical structure**

Dmitri Visser<sup>a</sup>, Katharina Rogg<sup>a</sup>, Ellena Fuhrmann<sup>a</sup>, Julia Marzi<sup>a,b</sup>, Katja Schenke-Layland<sup>a,b,c</sup>,  
Hanna Hartmann<sup>a,\*</sup>

- <sup>a</sup> NMI Natural and Medical Sciences Institute at the University of Tübingen, 72770 Reutlingen, Germany
- <sup>b</sup> Institute of Biomedical Engineering, Department for Medical Technologies & Regenerative Medicine, Eberhard Karls University Tübingen, 72076 Tübingen, Germany
- <sup>c</sup> Cluster of Excellence iFIT (EXC 2180) “Image-Guided and Functionally Instructed Tumor Therapies”, Eberhard Karls University Tübingen, 72076 Tübingen, Germany

\*Corresponding author: HH: Markwiesenstrasse 55, 72770 Reutlingen, E-mail:  
[hanna.hartmann@nmi.de](mailto:hanna.hartmann@nmi.de), Tel: +49 (0) 7121 51530-872

**Contents:**

|                  |                                                    |    |
|------------------|----------------------------------------------------|----|
| <b>Figure S1</b> | Second Harmonics Generation (SHG) comparison.      | S2 |
| <b>Figure S2</b> | SEM analysis of electrospun mats for cell culture. | S2 |

**a) Spectral emission of rat tail collagen (I) foam**

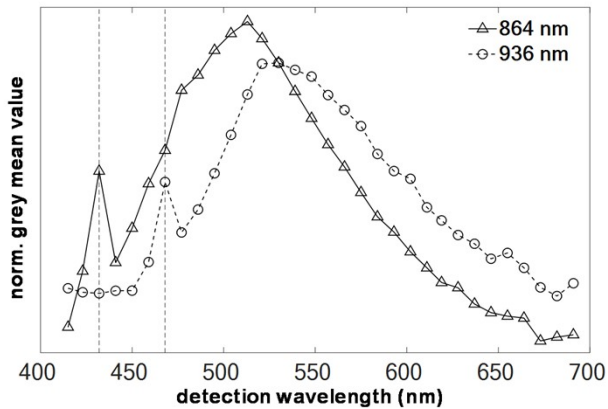

**b) SHG images of rat tail collagen (I) foam**

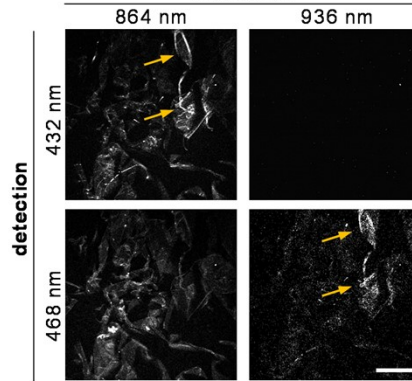

**c) Spectral Emission of ES collagen**

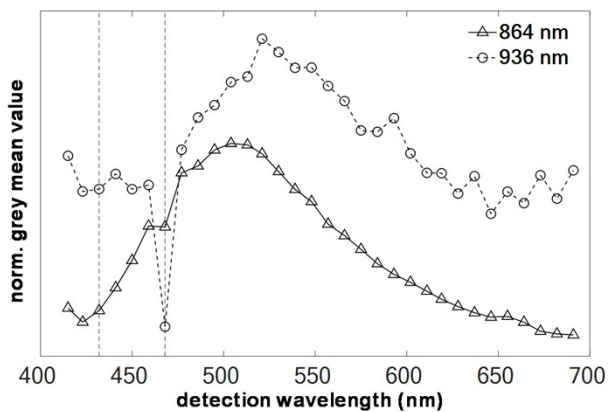

**d) SHG images of ES collagen**

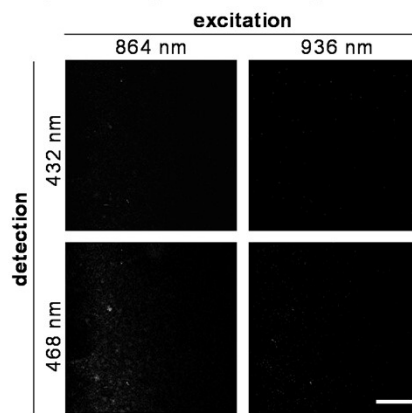

**Figure S 1 Second Harmonics Generation (SHG) comparison.** *a) Spectral emission of collagen (I) foam at two excitation wavelengths: 864 nm and 936 nm. Displayed is the recorded normalized grey mean value as function of the emission wavelength. Dotted vertical lines indicate the half wavelengths of the excitation wavelengths: at 468 and 936 nm. b) SHG images of collagen foam, indicating SHG-active regions of the foam at exactly half of the excitation wavelengths (yellow arrows). SHG-active regions remain visible when both the excitation and detection wavelength are proportionally increased. c) Analogously, spectral emission of electrospun collagen (ES-HAc/EtOH-30). d) Representative SHG images of electrospun collagen. No SHG-active regions can be detected in electrospun collagen. Scalebars in (b) and (d) correspond to 50  $\mu\text{m}$ .*

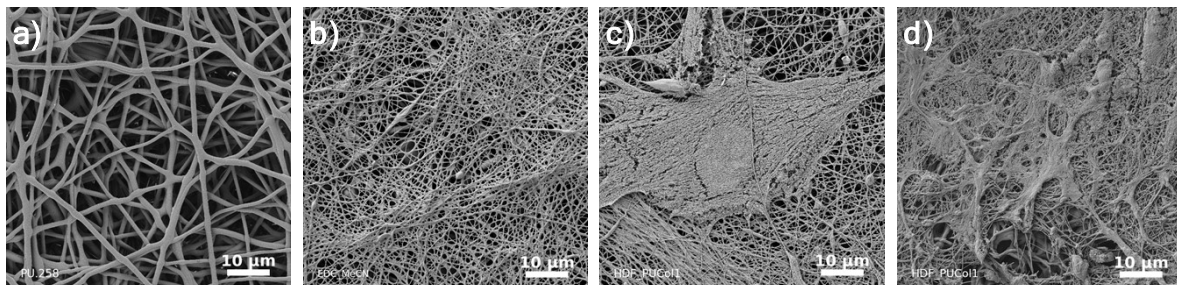

**Figure S 2 SEM analysis of electrospun mats for cell culture.** *a) Electrospun PU (ES PU). b) Electrospun collagen after crosslinking on top of electrospun PU (ES PUCOL). c) hDFs on collagen fibers (ES PUCOL) after 24 hours. d) hDFs on collagen fibers (ES PUCOL) after 7 days.*
